# Supplementary material for: Non-covalent interactions and their impact on the complexation thermodynamics of noble gases with methanol
Source: Royal Society of Chemistry journal article supplement (doi:10.1039/d0cp01416h), 2020-01-01
Supplement: d0cp01416h1.pdf [file d0cp01416h1.pdf]

*Supplementary Material for*

**Non-Covalent Interactions and their Impact on the Complexation Thermodynamics of Noble  
Gases with Methanol**

Lúcio R. Vieira,<sup>‡</sup> Sandro F. de Brito,<sup>‡</sup> Mateus R. Barbosa,<sup>‡</sup> Thiago O. Lopes,<sup>‡</sup> Daniel F. Scalabrini Machado,<sup>‡,\*</sup>  
and Heibbe C. B. de Oliveira<sup>†,\*</sup>

<sup>‡</sup>Laboratório de Modelagem de Sistemas Complexos (LMSC), Instituto de Química. Universidade de Brasília. Brasília. Brazil.

<sup>†</sup>Laboratório de Estrutura Eletrônica e Dinâmica Molecular (LEEDMOL), Instituto de Química. Universidade Federal de Goiás. Goiânia. Brazil.

\*E-mail: heibbe@ufg.br; daniel.scalabrini@unb.br

**Summary**

|           |   |
|-----------|---|
| Figure S1 | 2 |
| Figure S2 | 2 |
| Figure S3 | 3 |
| Figure S4 | 5 |
| Figure S5 | 6 |
| Figure S6 | 7 |
| Figure S7 | 7 |
| Figure S8 | 9 |
| Table S1  | 3 |
| Table S2  | 4 |
| Table S3  | 4 |
| Table S4  | 4 |
| Table S5  | 5 |
| Table S6  | 8 |

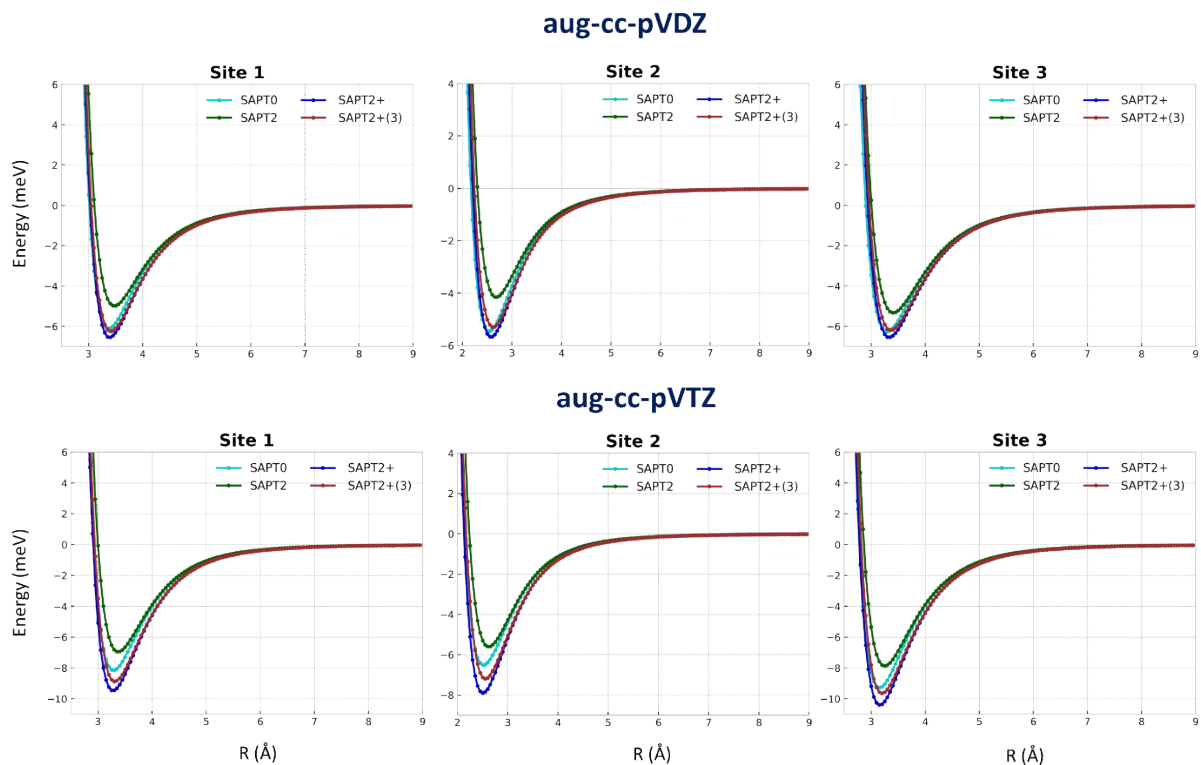

**Figure S1.** Basis set and SAPT perturbation order effects on the potential energy curves for the Ne-CH<sub>3</sub>OH dimers at different interaction sites.

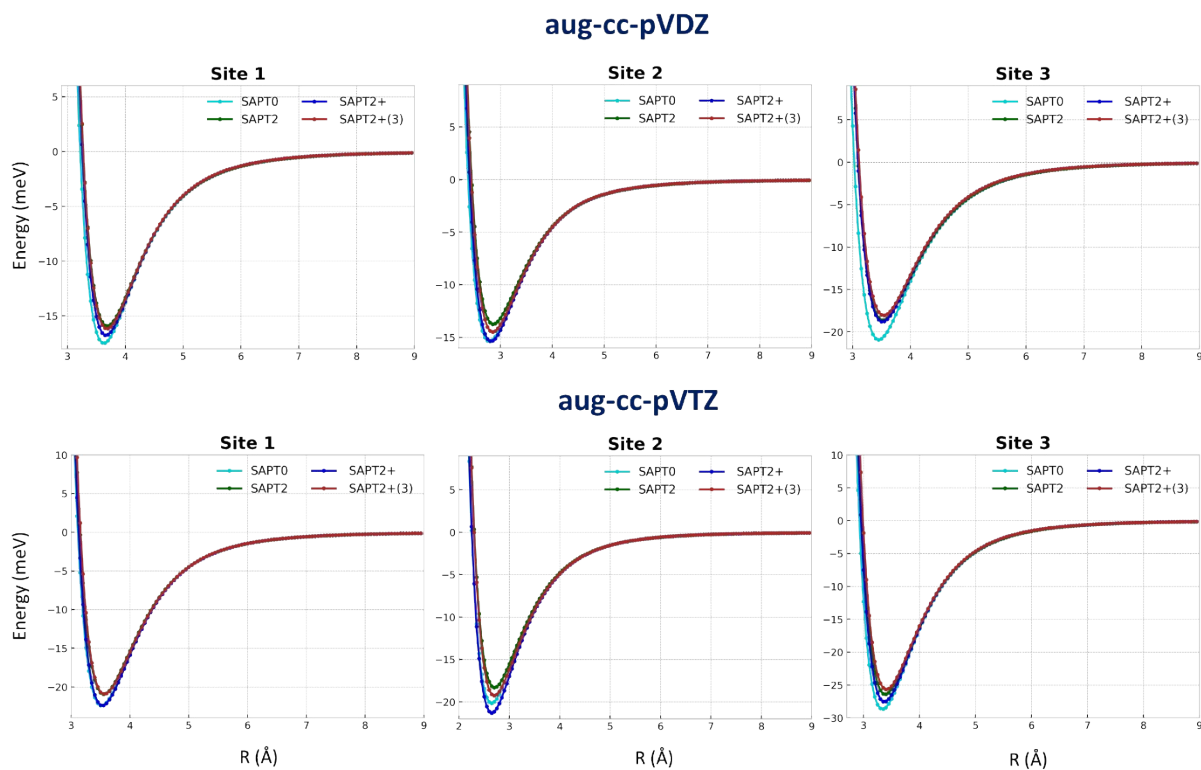

**Figure S2.** Basis set and SAPT perturbation order effects on the potential energy curves for the Ar-CH<sub>3</sub>OH dimers at different interaction sites.

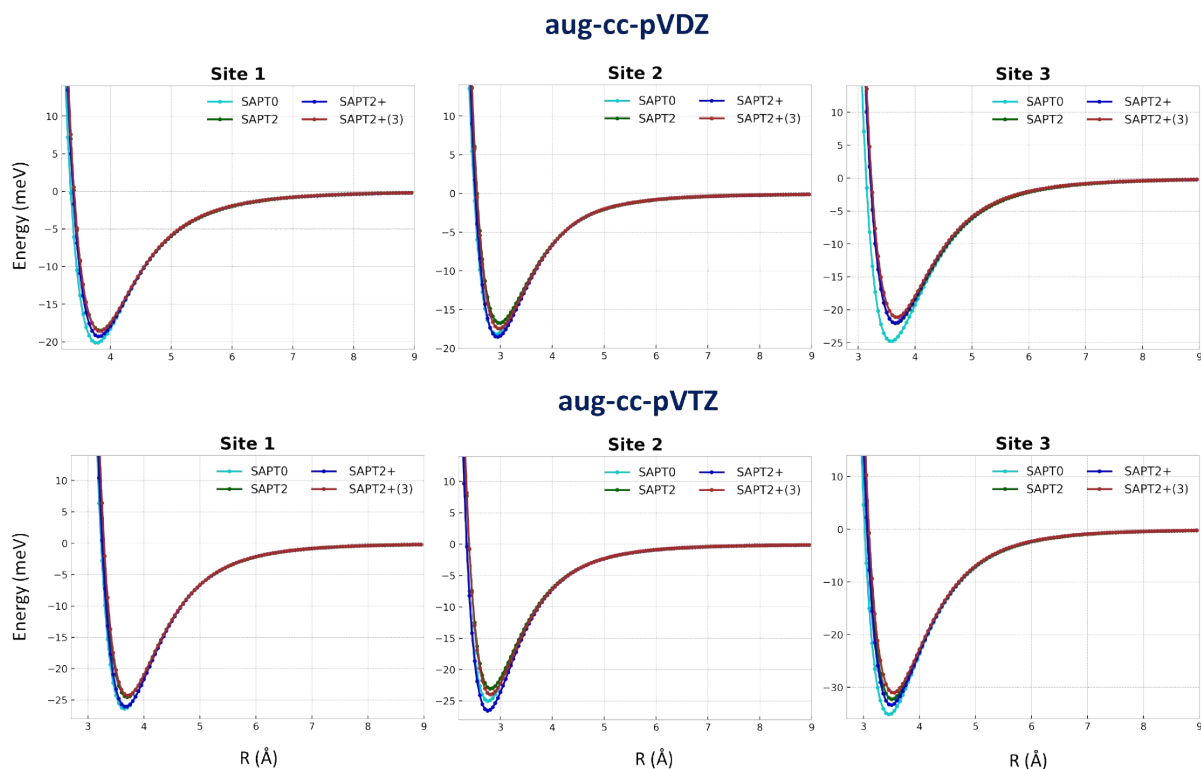

**Figure S3.** Basis set and SAPT perturbation order effects on the potential energy curves for the Kr-CH<sub>3</sub>OH dimers at different interaction sites.

**Table S1.** Energy decomposition of the intermolecular energies at the equilibrium length  $R_e$  for the three interaction sites of Ng-CH<sub>3</sub>OH dimers calculated at the SAPT2/aug-cc-pVTZ level of theory for the He and Ne cases; SAPT2/aug-cc-pVDZ for the Ar case and SAPT2+(3)/aug-cc-pVTZ for the Kr case. All energies in meV.

| Dimer                   |        | $E_{\text{lst}}$ | $E_{\text{exch}}$ | $E_{\text{ind}}$ | $E_{\text{disp}}$ | Total    |
|-------------------------|--------|------------------|-------------------|------------------|-------------------|----------|
| He - CH <sub>3</sub> OH | Site 1 | -1.3573          | 6.343316          | -0.47365         | -8.35751          | -3.84516 |
|                         | Site 2 | -0.5641          | 3.28694           | -0.94125         | -4.23239          | -2.4508  |
|                         | Site 3 | -1.10963         | 5.188201          | -0.91114         | -7.22365          | -4.05622 |
| Ne - CH <sub>3</sub> OH | Site 1 | -3.00423         | 9.963405          | -0.42694         | -13.4701          | -6.93783 |
|                         | Site 2 | -2.51499         | 8.066402          | -2.03525         | -9.11444          | -5.59827 |
|                         | Site 3 | -3.42651         | 11.33454          | -1.55427         | -14.2176          | -7.86379 |
| Ar - CH <sub>3</sub> OH | Site 1 | -6.17318         | 19.21294          | -1.50692         | -27.4328          | -15.8999 |
|                         | Site 2 | -5.06007         | 19.4416           | -6.30522         | -21.8108          | -13.7345 |
|                         | Site 3 | -8.2771          | 25.84336          | -4.67862         | -31.4816          | -18.5939 |
| Kr - CH <sub>3</sub> OH | Site 1 | -7.76375         | 23.08729          | -1.72725         | -32.1424          | -18.5461 |
|                         | Site 2 | -5.68371         | 26.15502          | -9.146           | -28.7355          | -17.4101 |
|                         | Site 3 | -9.30291         | 30.92135          | -6.52924         | -36.1985          | -21.1092 |

**Table S2.** Fitted parameters of the Ryd6 and ILJ analytical forms for the He-CH<sub>3</sub>OH dimer. Theoretical points calculated at the SAPT2/aug-cc-pVTZ level of theory. Values in parenthesis is relative to the ILJ function.

| Parameter   | Site 1                                    | Site 2                                    | Site 3                                    |
|-------------|-------------------------------------------|-------------------------------------------|-------------------------------------------|
| $c_1$       | 2.019                                     | 2.046                                     | 2.858                                     |
| $c_2$       | -1.348                                    | -1.062                                    | 1.169                                     |
| $c_3$       | 1.215                                     | 1.074                                     | 0.563                                     |
| $c_4$       | -0.403                                    | -0.348                                    | $-3.58 \times 10^{-2}$                    |
| $c_5$       | $7.65 \times 10^{-2}$                     | $7.84 \times 10^{-2}$                     | 0.485                                     |
| $c_6$       | $-8.99 \times 10^{-4}$                    | $-8.29 \times 10^{-6}$                    | $3.44 \times 10^{-3}$                     |
| $R_e$ (Å)   | 3.25                                      | 2.60                                      | 3.20                                      |
| $D_e$ (meV) | 3.88                                      | 2.45                                      | 4.05                                      |
| $\beta$     | 7.93                                      | 3.81                                      | 6.19                                      |
| $\chi^2$    | $9 \times 10^{-7}$ ( $5 \times 10^{-4}$ ) | $1 \times 10^{-6}$ ( $5 \times 10^{-3}$ ) | $1 \times 10^{-6}$ ( $5 \times 10^{-3}$ ) |

**Table S3.** Fitted parameters of the Ryd6 and ILJ analytical forms for the Ne-CH<sub>3</sub>OH dimer. Theoretical points calculated at the SAPT2/aug-cc-pVTZ level of theory. Values in parenthesis is relative to the ILJ function.

| Parameter   | Site 1                                      | Site 2                                        | Site 3                                        |
|-------------|---------------------------------------------|-----------------------------------------------|-----------------------------------------------|
| $c_1$       | 3.264                                       | 1.801                                         | 1.973                                         |
| $c_2$       | 1.663                                       | -1.772                                        | -1.202                                        |
| $c_3$       | 2.445                                       | 1.714                                         | 1.069                                         |
| $c_4$       | 1.887                                       | -0.882                                        | -0.334                                        |
| $c_5$       | -2.227                                      | 0.243                                         | 0.065                                         |
| $c_6$       | 1.126                                       | -0.023                                        | $-9.37 \times 10^{-7}$                        |
| $R_e$ (Å)   | 3.35                                        | 2.60                                          | 3.25                                          |
| $D_e$ (meV) | 6.94                                        | 5.60                                          | 7.86                                          |
| $\beta$     | 9.50                                        | 4.32                                          | 7.26                                          |
| $\chi^2$    | $1.6 \times 10^{-3}$ ( $1 \times 10^{-2}$ ) | $1.6 \times 10^{-3}$ ( $2.2 \times 10^{-2}$ ) | $1.7 \times 10^{-5}$ ( $1.7 \times 10^{-5}$ ) |

**Table S4.** Fitted parameters of the Ryd6 and ILJ analytical forms for the Ar-CH<sub>3</sub>OH dimer. Theoretical points calculated at the SAPT2/aug-cc-pVDZ level of theory. Values in parenthesis is relative to the ILJ function.

| Parameter   | Site 1                                      | Site 2                     | Site 3                                    |
|-------------|---------------------------------------------|----------------------------|-------------------------------------------|
| $c_1$       | 2.894                                       | 2.696                      | 2.982                                     |
| $c_2$       | 1.509                                       | 0.782                      | 2.041                                     |
| $c_3$       | 0.378                                       | 0.967                      | 0.494                                     |
| $c_4$       | -0.019                                      | 0.668                      | -0.093                                    |
| $c_5$       | 0.648                                       | -0.632                     | 0.909                                     |
| $c_6$       | $1.72 \times 10^{-4}$                       | 0.266                      | $1.83 \times 10^{-3}$                     |
| $R_e$ (Å)   | 3.70                                        | 2.85                       | 3.55                                      |
| $D_e$ (meV) | 15.90                                       | 13.73                      | 18.60                                     |
| $\beta$     | 7.64                                        | 4.15                       | 5.91                                      |
| $\chi^2$    | $8 \times 10^{-3}$ ( $2.6 \times 10^{-2}$ ) | $1.4 \times 10^{-4}$ (2.6) | $2 \times 10^{-2}$ ( $5 \times 10^{-2}$ ) |

$\times 10^{-2}$ )

**Table S5.** Fitted parameters of the Ryd6 and ILJ analytical forms for the Kr-CH<sub>3</sub>OH dimer. Theoretical points calculated at the SAPT2+(3)/aug-cc-pVDZ level of theory. Values in parenthesis is relative to the ILJ function.

| Parameter   | Site 1                                      | Site 2                    | Site 3                                      |
|-------------|---------------------------------------------|---------------------------|---------------------------------------------|
| $c_1$       | 2.694                                       | 2.569                     | 2.900                                       |
| $c_2$       | 0.863                                       | 0.364                     | 1.789                                       |
| $c_3$       | 0.885                                       | 0.658                     | 0.432                                       |
| $c_4$       | 0.618                                       | 0.580                     | -0.016                                      |
| $c_5$       | -0.501                                      | -0.384                    | 0.654                                       |
| $c_6$       | 0.224                                       | 0.146                     | $1.7 \times 10^{-3}$                        |
| $R_e$ (Å)   | 3.85                                        | 2.95                      | 3.70                                        |
| $D_e$ (meV) | 18.54                                       | 17.41                     | 21.11                                       |
| $\beta$     | 8.25                                        | 3.25                      | 5.85                                        |
| $\chi^2$    | $5 \times 10^{-3}$ ( $2.2 \times 10^{-2}$ ) | $3 \times 10^{-3}$ (0.21) | $3.6 \times 10^{-2}$ ( $8 \times 10^{-2}$ ) |

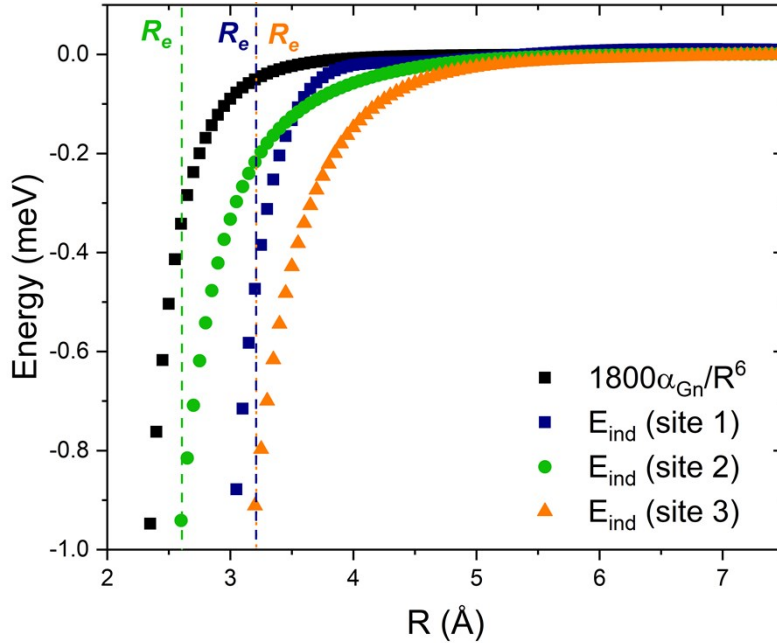

**Figure S4.** Comparison of induction energies  $E_{ind}$  between the semi-empirical formulation based on Debye's formula and the theory calculated at the SAPT2/aug-cc-pVTZ level for the He-CH<sub>3</sub>OH dimer. Vertical dashed lines indicate the equilibrium distance of the interacting dimer at different sites on the methanol molecule. The static linear polarizability of He-atom was set to  $\alpha_0 = 0.204 \text{ \AA}^3$ . Debye's formula for the permanent dipole-induced dipole interaction is given by  $E_{ind} = E_{Debye}(R) = -\mu_{CH_3OH}^2 \alpha_{Gn} / (4\pi\epsilon_0)^2 R^6$ , with  $\mu_{CH_3OH}$  standing for the dipole moment of methanol. The numeric coefficient is obtained when  $\text{meV} \cdot \text{\AA}^3$  units are used.

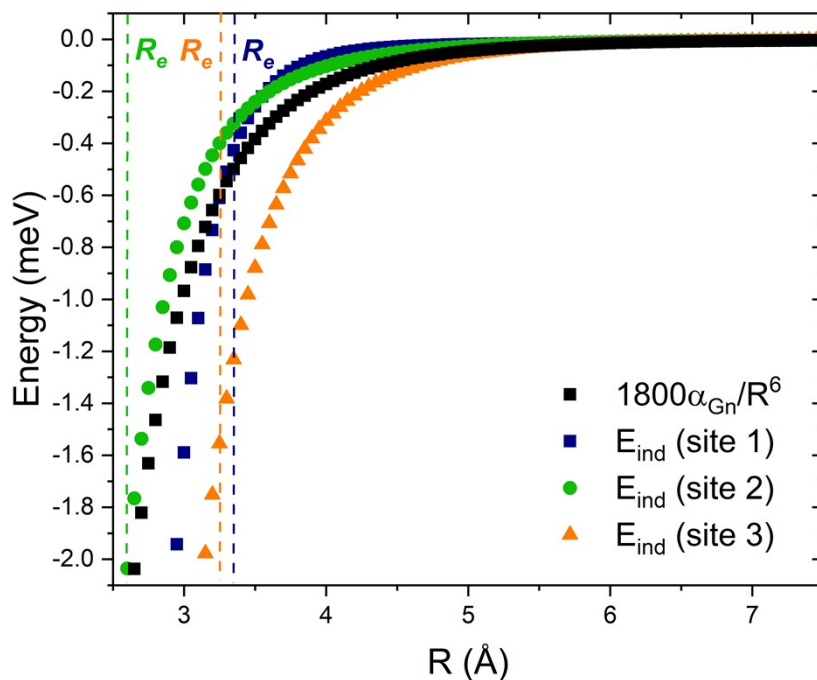

**Figure S5.** Comparison of induction energies  $E_{ind}$  between the semi-empirical formulation based on Debye's formula and the theory calculated at the SAPT2/aug-cc-pVTZ level for the Ne-CH<sub>3</sub>OH dimer. Vertical dashed lines indicate the equilibrium distance of the interacting dimer at different sites on the methanol molecule. The static linear polarizability of Ne-atom was set to  $\alpha_0 = 0.392 \text{ \AA}^3$ . Debye's formula for the permanent dipole-induced dipole interaction is given by  $E_{ind} = E_{Debye}(R) = -\mu_{CH_3OH}^2 \alpha_{Gn} / (4\pi\epsilon_0)^2 R^6$ , with  $\mu_{CH_3OH}$  standing for the dipole moment of methanol. The numeric coefficient is obtained when  $\text{meV} \cdot \text{\AA}^3$  units are used.

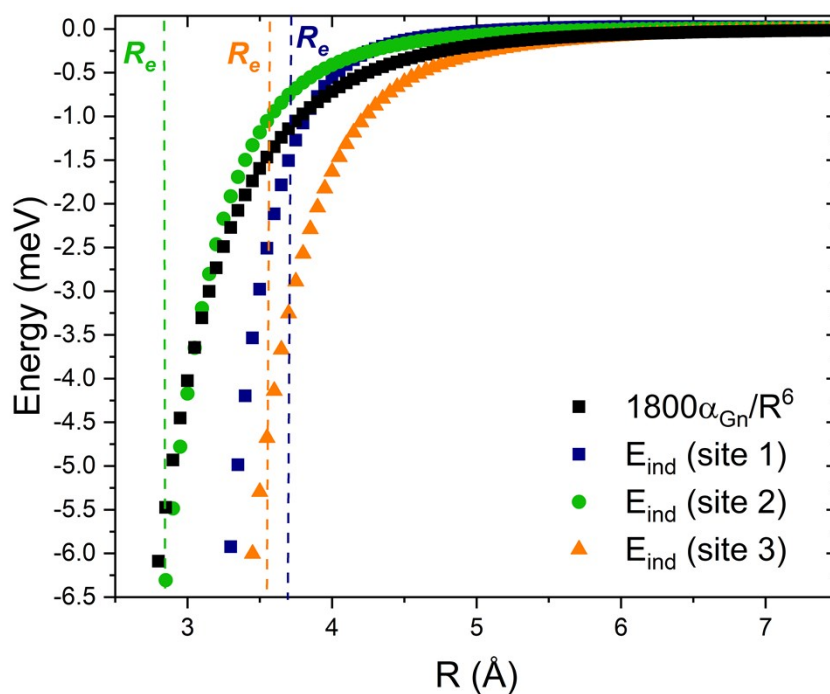

**Figure S6.** Comparison of induction energies  $E_{ind}$  between the semi-empirical formulation based on Debye's formula and the theory calculated at the SAPT2/aug-cc-pVDZ level for the Ar-CH<sub>3</sub>OH dimer. Vertical dashed lines indicate the equilibrium distance of the interacting dimer at different sites on the methanol molecule. The static linear polarizability of Ar-atom was set to  $\alpha_0 = 1.630 \text{ \AA}^3$ . Debye's formula for the permanent dipole-induced dipole interaction is given by  $E_{ind} = E_{Debye}(R) = -\mu_{CH_3OH}^2 \alpha_{Gn} / (4\pi\epsilon_0)^2 R^6$ , with  $\mu_{CH_3OH}$  standing for the dipole moment of methanol. The numeric coefficient is obtained when  $\text{meV} \cdot \text{\AA}^3$  units are used.

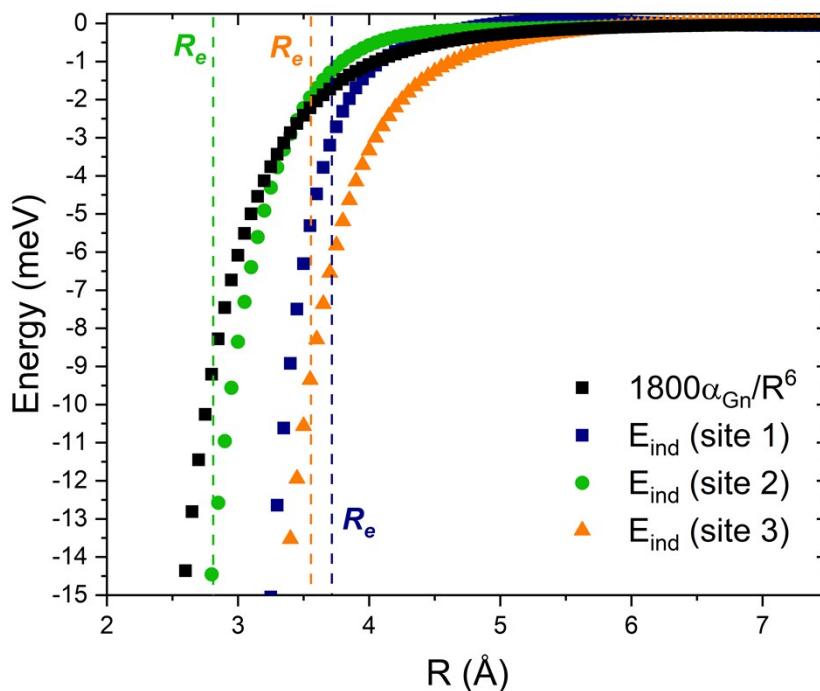

**Figure S7.** Comparison of induction energies  $E_{ind}$  between the semi-empirical formulation based on Debye's formula and the theory calculated at the SAPT2+(3)/aug-cc-pVTZ level for the Kr-CH<sub>3</sub>OH dimer. Vertical dashed lines indicate the equilibrium distance of the interacting dimer at different sites on the methanol molecule. The static linear polarizability of Kr-atom was set to  $\alpha_0 = 2.465 \text{ \AA}^3$ . Debye's formula for the permanent dipole-induced dipole interaction is given by  $E_{ind} = E_{Debye}(R) = -\mu_{CH_3OH}^2 \alpha_{Gn} / (4\pi\epsilon_0)^2 R^6$ , with  $\mu_{CH_3OH}$  standing for the dipole moment of methanol. The numeric coefficient is obtained when  $\text{meV} \cdot \text{\AA}^3$  units are used.

**Table S6.** Bound eigenvalues of the Nuclear Schrödinger Equation calculated with the potential energies of the interacting complexes Ng-CH<sub>3</sub>OH for two rotational state  $J = 0$  and 1.

| Ng | Rotational State | Site 1                            | Site 2 | Site 3 |
|----|------------------|-----------------------------------|--------|--------|
|    |                  | $\epsilon_{v,J} (\text{cm}^{-1})$ |        |        |
|    |                  |                                   |        |        |

|    |         |                                                                                                                                                                                                                                                                                                                                                  |                                                                                                                                                                                                                                                                                                                  |                                                                                                                                                                                                                                                                                                                                                                                  |
|----|---------|--------------------------------------------------------------------------------------------------------------------------------------------------------------------------------------------------------------------------------------------------------------------------------------------------------------------------------------------------|------------------------------------------------------------------------------------------------------------------------------------------------------------------------------------------------------------------------------------------------------------------------------------------------------------------|----------------------------------------------------------------------------------------------------------------------------------------------------------------------------------------------------------------------------------------------------------------------------------------------------------------------------------------------------------------------------------|
| He | $J = 0$ | $\varepsilon_{0,0} = 12.17$                                                                                                                                                                                                                                                                                                                      | $\varepsilon_{0,0} = 5.19$                                                                                                                                                                                                                                                                                       | $\varepsilon_{0,0} = 14.00$                                                                                                                                                                                                                                                                                                                                                      |
|    | $J = 1$ | $\varepsilon_{0,1} = 11.47$                                                                                                                                                                                                                                                                                                                      | $\varepsilon_{0,1} = 5.90$                                                                                                                                                                                                                                                                                       | $\varepsilon_{0,1} = 13.27$                                                                                                                                                                                                                                                                                                                                                      |
| Ne | $J = 0$ | $\varepsilon_{0,0} = 41.38$<br>$\varepsilon_{1,0} = 19.55$<br>$\varepsilon_{2,0} = 6.79$<br>$\varepsilon_{3,0} = 1.24$                                                                                                                                                                                                                           | $\varepsilon_{0,0} = 32.41$<br>$\varepsilon_{1,0} = 13.57$<br>$\varepsilon_{2,1} = 3.67$<br>$\varepsilon_{3,0} = 0.38$                                                                                                                                                                                           | $\varepsilon_{0,0} = 48.20$<br>$\varepsilon_{1,0} = 24.84$<br>$\varepsilon_{2,0} = 10.22$<br>$\varepsilon_{3,0} = 2.74$                                                                                                                                                                                                                                                          |
|    | $J = 1$ | $\varepsilon_{0,1} = 41.15$<br>$\varepsilon_{1,1} = 19.36$<br>$\varepsilon_{2,1} = 6.64$<br>$\varepsilon_{3,1} = 1.16$                                                                                                                                                                                                                           | $\varepsilon_{0,1} = 32.04$<br>$\varepsilon_{1,1} = 13.29$<br>$\varepsilon_{2,1} = 3.48$                                                                                                                                                                                                                         | $\varepsilon_{0,1} = 47.95$<br>$\varepsilon_{1,1} = 24.63$<br>$\varepsilon_{2,1} = 10.06$<br>$\varepsilon_{3,1} = 2.63$                                                                                                                                                                                                                                                          |
| Ar | $J = 0$ | $\varepsilon_{0,0} = 110.71$<br>$\varepsilon_{1,0} = 79.69$<br>$\varepsilon_{2,0} = 54.41$<br>$\varepsilon_{3,0} = 34.71$<br>$\varepsilon_{4,0} = 20.25$<br>$\varepsilon_{5,0} = 10.43$<br>$\varepsilon_{6,0} = 4.44$<br>$\varepsilon_{7,0} = 1.35$<br>$\varepsilon_{8,0} = 0.10$                                                                | $\varepsilon_{0,0} = 94.70$<br>$\varepsilon_{1,0} = 66.72$<br>$\varepsilon_{2,0} = 44.24$<br>$\varepsilon_{3,0} = 27.04$<br>$\varepsilon_{4,0} = 14.80$<br>$\varepsilon_{5,0} = 6.84$<br>$\varepsilon_{6,0} = 2.54$<br>$\varepsilon_{7,0} = 0.54$                                                                | $\varepsilon_{0,0} = 131.95$<br>$\varepsilon_{1,0} = 99.24$<br>$\varepsilon_{2,0} = 71.81$<br>$\varepsilon_{3,0} = 49.47$<br>$\varepsilon_{4,0} = 31.97$<br>$\varepsilon_{5,0} = 18.96$<br>$\varepsilon_{6,0} = 9.98$<br>$\varepsilon_{7,0} = 4.42$<br>$\varepsilon_{8,0} = 1.40$<br>$\varepsilon_{9,0} = 0.08$                                                                  |
|    | $J = 1$ | $\varepsilon_{0,1} = 110.57$<br>$\varepsilon_{1,1} = 79.56$<br>$\varepsilon_{2,1} = 54.29$<br>$\varepsilon_{3,1} = 34.60$<br>$\varepsilon_{4,1} = 20.16$<br>$\varepsilon_{5,1} = 10.35$<br>$\varepsilon_{6,1} = 4.38$<br>$\varepsilon_{7,1} = 1.31$<br>$\varepsilon_{8,1} = 0.08$                                                                | $\varepsilon_{0,0} = 94.47$<br>$\varepsilon_{1,0} = 66.52$<br>$\varepsilon_{2,0} = 44.06$<br>$\varepsilon_{3,0} = 26.85$<br>$\varepsilon_{4,0} = 14.53$<br>$\varepsilon_{5,0} = 6.60$<br>$\varepsilon_{6,0} = 2.30$<br>$\varepsilon_{7,0} = 0.40$                                                                | $\varepsilon_{0,1} = 131.80$<br>$\varepsilon_{1,1} = 99.11$<br>$\varepsilon_{2,1} = 71.68$<br>$\varepsilon_{3,1} = 49.35$<br>$\varepsilon_{4,1} = 31.87$<br>$\varepsilon_{5,1} = 18.87$<br>$\varepsilon_{6,1} = 9.91$<br>$\varepsilon_{7,1} = 4.37$<br>$\varepsilon_{8,1} = 1.36$<br>$\varepsilon_{9,1} = 0.05$                                                                  |
| Kr | $J = 0$ | $\varepsilon_{0,0} = 133.26$<br>$\varepsilon_{1,0} = 103.54$<br>$\varepsilon_{2,0} = 78.00$<br>$\varepsilon_{3,0} = 56.62$<br>$\varepsilon_{4,0} = 39.30$<br>$\varepsilon_{5,0} = 25.83$<br>$\varepsilon_{6,0} = 15.82$<br>$\varepsilon_{7,0} = 8.82$<br>$\varepsilon_{8,0} = 4.32$<br>$\varepsilon_{9,0} = 1.75$<br>$\varepsilon_{10,0} = 0.42$ | $\varepsilon_{0,0} = 124.94$<br>$\varepsilon_{1,0} = 96.67$<br>$\varepsilon_{2,0} = 72.34$<br>$\varepsilon_{3,0} = 51.94$<br>$\varepsilon_{4,0} = 35.37$<br>$\varepsilon_{5,0} = 22.48$<br>$\varepsilon_{6,0} = 13.07$<br>$\varepsilon_{7,0} = 6.82$<br>$\varepsilon_{8,0} = 3.15$<br>$\varepsilon_{9,0} = 1.13$ | $\varepsilon_{0,0} = 153.74$<br>$\varepsilon_{1,0} = 123.00$<br>$\varepsilon_{2,0} = 96.06$<br>$\varepsilon_{3,0} = 72.90$<br>$\varepsilon_{4,0} = 53.41$<br>$\varepsilon_{5,0} = 37.50$<br>$\varepsilon_{6,0} = 24.94$<br>$\varepsilon_{7,0} = 15.51$<br>$\varepsilon_{8,0} = 8.86$<br>$\varepsilon_{9,0} = 4.52$<br>$\varepsilon_{10,0} = 7.90$<br>$\varepsilon_{11,0} = 0.43$ |
|    | $J = 1$ | $\varepsilon_{0,1} = 133.17$<br>$\varepsilon_{1,1} = 103.44$<br>$\varepsilon_{2,1} = 77.44$<br>$\varepsilon_{3,1} = 56.54$<br>$\varepsilon_{4,1} = 39.23$<br>$\varepsilon_{5,1} = 25.76$<br>$\varepsilon_{6,1} = 15.77$<br>$\varepsilon_{7,1} = 8.77$                                                                                            | $\varepsilon_{0,1} = 124.82$<br>$\varepsilon_{1,1} = 92.3247$<br>$\varepsilon_{2,1} = 72.21$<br>$\varepsilon_{3,1} = 51.82$<br>$\varepsilon_{4,1} = 35.25$<br>$\varepsilon_{5,1} = 22.38$<br>$\varepsilon_{6,1} = 12.99$<br>$\varepsilon_{7,1} = 6.76$                                                           | $\varepsilon_{0,1} = 153.63$<br>$\varepsilon_{1,1} = 122.90$<br>$\varepsilon_{2,1} = 95.97$<br>$\varepsilon_{3,1} = 72.81$<br>$\varepsilon_{4,1} = 53.33$<br>$\varepsilon_{5,1} = 37.42$<br>$\varepsilon_{6,1} = 24.88$<br>$\varepsilon_{7,1} = 15.45$                                                                                                                           |



|  |  |                                                                                |                                                    |                                                                                                            |
|--|--|--------------------------------------------------------------------------------|----------------------------------------------------|------------------------------------------------------------------------------------------------------------|
|  |  | $\epsilon_{8.1} = 4.28$<br>$\epsilon_{9.1} = 1.73$<br>$\epsilon_{10.1} = 0.40$ | $\epsilon_{8.1} = 3.11$<br>$\epsilon_{9.1} = 1.10$ | $\epsilon_{8.1} = 8.81$<br>$\epsilon_{9.1} = 4.48$<br>$\epsilon_{10.1} = 1.86$<br>$\epsilon_{11.1} = 0.40$ |
|--|--|--------------------------------------------------------------------------------|----------------------------------------------------|------------------------------------------------------------------------------------------------------------|

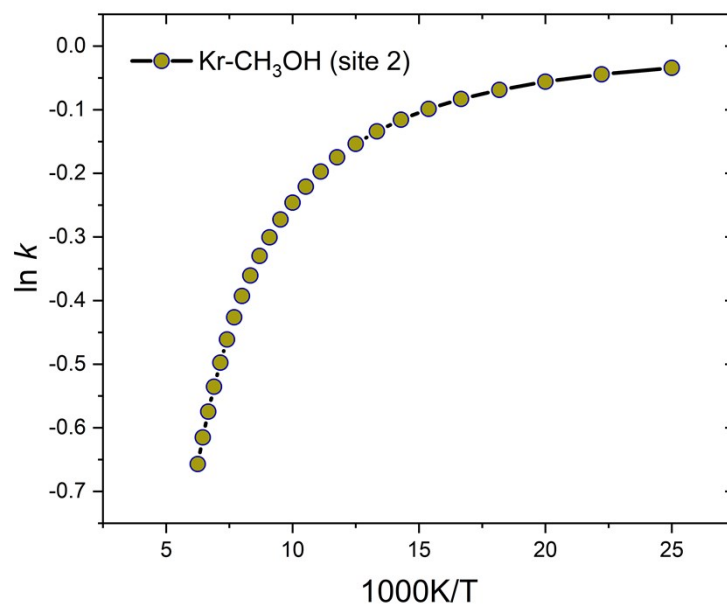

**Figure S8.** Equilibrium constant of complex formation of the Kr-CH<sub>3</sub>OH van der Waals adduct as a function of temperature. For highly harmonic dimers the  $\ln k$  vs  $1/T$  plot usually returns a Van't Hoff-like straight line, but for complexes in the present study, the significant contribution of the anharmonic constant  $\omega_e x_e$  induces a high distorted curve as the temperature increases and the complexes spend more time at large separation regions of the potential energy curve.
